# Supplementary material
Source: ML conference proceedings conference paper supplement (https://proceedings.neurips.cc/paper_files/paper/2018/hash/db29450c3f5e97f97846693611f98c15-Abstract.html)
Supplement: Supplementary file [file db29450c3f5e97f97846693611f98c15-Supplemental.zip]

---

# Supplementary Material for Derivative Estimation in Random Design

---

Yu Liu<sup>1</sup>, Kris De Brabanter<sup>1,2\*</sup>

<sup>1</sup>Department of Computer Science, <sup>2</sup>Department of Statistics

## 1 Proof of Proposition 1

$$\begin{aligned}
 \text{Var}[\hat{Y}_i^{(1)} | \mathbb{U}] &= \text{Var} \left[ \sum_{j=1}^k w_{i,j} \cdot \left( \frac{Y_{i+j} - Y_{i-j}}{U_{(i+j)} - U_{(i-j)}} \right) \mid \mathbb{U} \right] \\
 &= \left( 1 - \sum_{j=2}^k w_{i,j} \right)^2 \text{Var} \left[ \frac{Y_{i+1} - Y_{i-1}}{U_{(i+1)} - U_{(i-1)}} \mid \mathbb{U} \right] \\
 &\quad + \sum_{j=2}^k w_{i,j}^2 \text{Var} \left[ \frac{Y_{i+j} - Y_{i-j}}{U_{(i+j)} - U_{(i-j)}} \mid \mathbb{U} \right] \\
 &= \left( 1 - \sum_{j=2}^k w_{i,j} \right)^2 \frac{2\sigma_e^2}{(U_{(i+1)} - U_{(i-1)})^2} + \frac{2\sigma_e^2}{(U_{(i+j)} - U_{(i-j)})^2} \sum_{j=2}^k w_{i,j}^2.
 \end{aligned}$$

Setting the partial derivatives to zero yields

$$w_{i,j} = w_{i,1} \frac{(U_{(i+j)} - U_{(i-j)})^2}{(U_{(i+1)} - U_{(i-1)})^2}.$$

Using the fact that  $\sum_{j=1}^k w_{i,j} = 1$  results in

$$\sum_{j=1}^k w_{i,j} = w_{i,1} \sum_{j=1}^k \frac{(U_{(i+j)} - U_{(i-j)})^2}{(U_{(i+1)} - U_{(i-1)})^2} = 1.$$

Consequently, this gives

$$w_{i,j} \frac{(U_{(i+1)} - U_{(i-1)})^2}{(U_{(i+j)} - U_{(i-j)})^2} \sum_{j=1}^k \frac{(U_{(i+j)} - U_{(i-j)})^2}{(U_{(i+1)} - U_{(i-1)})^2} = 1$$

proving the proposition.

## 2 Proof of Lemma 1

Following [1, p. 14] we have

$$U_{(i+j)} - U_{(i-j)} \sim \text{Beta}(2j, n+1-2j).$$

---

\*Liu and De Brabanter are with Iowa State University, Ames, IA 50011, USA. Corresponding authors: yuliu@iastate.edu, kbrabant@iastate.edu

It immediately follows that

$$\begin{aligned} U_{(i+j)} - U_{(i-j)} &= \mathbf{E}\{U_{(i+j)} - U_{(i-j)}\} + O_p\left[\sqrt{\mathbf{Var}\{U_{(i+j)} - U_{(i-j)}\}}\right] \\ &= \frac{2j}{n+1} + O_p\left(\sqrt{\frac{j}{n^2}}\right) \end{aligned}$$

Similarly, according to the property of uniform order statistics we have

$$U_{(i+j)} - U_{(i)} \sim \text{Beta}(j, n+1-j)$$

and

$$\begin{aligned} U_{(i+j)} - U_{(i)} &= \mathbf{E}\{U_{(i+j)} - U_{(i)}\} + O_p\left[\sqrt{\mathbf{Var}\{U_{(i+j)} - U_{(i)}\}}\right] \\ &= \frac{j}{n+1} + O_p\left(\sqrt{\frac{j}{n^2}}\right). \end{aligned}$$

The proof of the third part of the lemma is analogous to the proof above and is therefore omitted.

### 3 Proof of Theorem 1

Since  $r(\cdot)$  is twice continuously differentiable on  $[0, 1]$ , the following Taylor expansions are valid for  $r(U_{(i+j)})$  and  $r(U_{(i-j)})$  in a neighborhood of  $U_{(i)}$ :

$$r(U_{(i+j)}) = r(U_{(i)}) + (U_{(i+j)} - U_{(i)})r'(U_{(i)}) + \frac{(U_{(i+j)} - U_{(i)})^2}{2}r^{(2)}(\zeta_{i,i+j})$$

and

$$r(U_{(i-j)}) = r(U_{(i)}) + (U_{(i-j)} - U_{(i)})r'(U_{(i)}) + \frac{(U_{(i-j)} - U_{(i)})^2}{2}r^{(2)}(\zeta_{i-j,i}),$$

where  $\zeta_{i,i+j} \in ]U_{(i)}, U_{(i+j)}[$  and  $\zeta_{i-j,i} \in ]U_{(i-j)}, U_{(i)}[$ . Using Lemma 1 and Proposition 1, the absolute conditional bias is bounded above by

$$\begin{aligned} |\text{bias}[\hat{Y}_i^{(1)} | \mathbb{U}]| &= \left| \mathbf{E} \left[ \sum_{j=1}^k w_{i,j} \cdot \left( \frac{Y_{i+j} - Y_{i-j}}{U_{(i+j)} - U_{(i-j)}} \right) | \mathbb{U} \right] - r'(U_i) \right| \\ &= \frac{1}{2} \left| \sum_{j=1}^k w_{i,j} \frac{(U_{(i+j)} - U_{(i)})^2 r^{(2)}(\zeta_{i,i+j}) - (U_{(i-j)} - U_{(i)})^2 r^{(2)}(\zeta_{i-j,i})}{U_{(i+j)} - U_{(i-j)}} \right| \\ &= \frac{1}{2} \left| \frac{1}{\sum_{l=1}^k (U_{(i+l)} - U_{(i-l)})^2} \left( \sum_{j=1}^k (U_{(i+j)} - U_{(i-j)}) \{ (U_{(i+j)} - U_{(i)})^2 r^{(2)}(\zeta_{i,i+j}) \right. \right. \\ &\quad \left. \left. - (U_{(i-j)} - U_{(i)})^2 r^{(2)}(\zeta_{i-j,i}) \} \right) \right| \\ &\leq \frac{1}{2} \sup_{u \in [0,1]} |r^{(2)}(u)| \frac{\sum_{j=1}^k (U_{(i+j)} - U_{(i-j)}) \{ (U_{(i+j)} - U_{(i)})^2 + (U_{(i-j)} - U_{(i)})^2 \}}{\sum_{l=1}^k (U_{(i+l)} - U_{(i-l)})^2} \\ &= \frac{1}{2} \sup_{u \in [0,1]} |r^{(2)}(u)| \frac{\frac{k^2(k+1)^2}{(n+1)^3} \{1 + O_p(\frac{1}{\sqrt{k}})\}}{\frac{2k(k+1)(2k+1)}{3(n+1)^2} \{1 + O_p(\frac{1}{\sqrt{k}})\}} \\ &= \sup_{u \in [0,1]} |r^{(2)}(u)| \frac{3k(k+1)}{4(n+1)(2k+1)} \left\{ 1 + O_p\left(\frac{1}{\sqrt{k}}\right) \right\}. \end{aligned}$$

Then for  $k \rightarrow \infty$  as  $n \rightarrow \infty$

$$|\text{bias}[\hat{Y}_i^{(1)} | \mathbb{U}]| \leq \sup_{u \in [0,1]} |r^{(2)}(u)| \frac{3k(k+1)}{4(n+1)(2k+1)} \{1 + o_p(1)\}.$$

Using Proposition 1, the conditional variance yields

$$\begin{aligned}
\mathbf{Var}[\hat{Y}_i^{(1)}|\mathbb{U}] &= \mathbf{Var}\left[\sum_{j=1}^k w_{i,j} \cdot \left(\frac{Y_{i+j} - Y_{i-j}}{U_{(i+j)} - U_{(i-j)}}\right) \mid \mathbb{U}\right] \\
&= 2\sigma_e^2 \frac{\sum_{j=1}^k (U_{(i+j)} - U_{(i-j)})^2}{\left(\sum_{l=1}^k (U_{(i+l)} - U_{(i-l)})^2\right)^2} \\
&= 2\sigma_e^2 \frac{1}{\sum_{l=1}^k (U_{(i+l)} - U_{(i-l)})^2} \\
&= 2\sigma_e^2 \frac{1}{\frac{2k(k+1)(2k+1)}{3(n+1)^2} \{1 + o_p(1)\}} \\
&= \frac{3\sigma_e^2(n+1)^2}{k(k+1)(2k+1)} \{1 + o_p(1)\},
\end{aligned}$$

provided that  $k \rightarrow \infty$  as  $n \rightarrow \infty$ . Both results hold uniformly for  $k+1 \leq i \leq n-k$ .

#### 4 Proof of Corollary 1

Under the conditions  $k \rightarrow \infty$  as  $n \rightarrow \infty$  such that  $n^{-1}k \rightarrow 0$  and  $n^2k^{-3} \rightarrow 0$ , Theorem 1 states that the upperbound of conditional bias and conditional variance go to zero. Consequently, we have that

$$\lim_{n \rightarrow \infty} \text{MSE}[\hat{Y}_i^{(1)}|\mathbb{U}] = 0.$$

According to Chebyshev's inequality the proof is complete.

#### 5 Proof of Corollary 2

From the bias-variance decomposition of the mean squared error (MSE), it follows that

$$\text{MSE}[\hat{Y}_i^{(1)}|\mathbb{U}] \leq \mathcal{B}^2 \frac{9k^2(k+1)^2}{16(n+1)^2(2k+1)^2} + \frac{3\sigma_e^2(n+1)^2}{k(k+1)(2k+1)} + o_p(n^{-2}k^2 + n^2k^{-3}),$$

with  $\mathcal{B} = \sup_{u \in [0,1]} |r^{(2)}(u)|$ . Since  $U \sim \mathcal{U}(0,1)$ , the mean integrated squared error (MISE) which measures the average global error is

$$\begin{aligned}
\text{MISE}[\hat{Y}^{(1)}|\mathbb{U}] &= \int_0^1 \text{MSE}[\hat{Y}_i^{(1)}|\mathbb{U}] du \\
&\leq \mathcal{B}^2 \frac{9k^2(k+1)^2}{16(n+1)^2(2k+1)^2} + \frac{3\sigma_e^2(n+1)^2}{k(k+1)(2k+1)} + o_p(n^{-2}k^2 + n^2k^{-3}).
\end{aligned}$$

Denote the asymptotic MISE (AMISE) by

$$\text{AMISE}[\hat{Y}^{(1)}|\mathbb{U}] \leq \mathcal{B}^2 \frac{9k^2(k+1)^2}{16(n+1)^2(2k+1)^2} + \frac{3\sigma_e^2(n+1)^2}{k(k+1)(2k+1)}.$$

## 6 Asymptotic order of the bias and continuous differentiability of $r$

Assume the  $q + 1$  derivatives of  $r(\cdot)$  exist on  $[0, 1]$ , the following Taylor expansions are valid for  $r(U_{(i+j)})$  and  $r(U_{(i-j)})$  in a neighborhood of  $U_{(i)}$

$$\begin{aligned} r(U_{(i+j)}) &= r(U_{(i)}) + \sum_{l=1}^q \frac{1}{l!} (U_{(i+j)} - U_{(i)})^l r^{(l)}(U_{(i)}) + O_p(U_{(i+j)} - U_{(i)})^{q+1} \\ &= r(U_{(i)}) + \sum_{l=1}^q \frac{1}{l!} (U_{(i+j)} - U_{(i)})^l r^{(l)}(U_{(i)}) + O_p\{(j/n)^{q+1}\} \\ r(U_{(i-j)}) &= r(U_{(i)}) + \sum_{l=1}^q \frac{1}{l!} (U_{(i-j)} - U_{(i)})^l r^{(l)}(U_{(i)}) + O_p(U_{(i-j)} - U_{(i)})^{q+1} \\ &= r(U_{(i)}) + \sum_{l=1}^q \frac{1}{l!} (U_{(i-j)} - U_{(i)})^l r^{(l)}(U_{(i)}) + O_p\{(j/n)^{q+1}\}. \end{aligned}$$

Taking expectations, using Lemma 1 and for  $\sum_{j=1}^k w_{i,j} = 1$

$$\begin{aligned} \mathbf{E}[\hat{Y}_i^{(1)} | \mathbb{U}] &= \sum_{j=1}^k w_{i,j} \frac{r(U_{(i+j)}) - r(U_{(i-j)})}{U_{(i+j)} - U_{(i-j)}} \\ &= \frac{1}{\sum_{p=1}^k (U_{(i+p)} - U_{(i-p)})^2} \left( \sum_{j=1}^k (U_{(i+j)} - U_{(i-j)}) \left[ \sum_{l=1}^q \frac{r^{(l)}(U_{(i)})}{l!} \{ (U_{(i+j)} - U_{(i)})^l \right. \right. \\ &\quad \left. \left. - (U_{(i-j)} - U_{(i)})^l \} + O_p\{(j/n)^{q+1}\} \right] \right) \end{aligned}$$

For  $q = 1$

$$\begin{aligned} \text{bias}[\hat{Y}_i^{(1)} | \mathbb{U}] &= \frac{r^{(1)}(U_{(i)}) \sum_{j=1}^k (U_{(i+j)} - U_{(i-j)})^2 + O_p(k^4/n^3)}{\sum_{p=1}^k (U_{(i+p)} - U_{(i-p)})^2} - r^{(1)}(U_{(i)}) \\ &= O_p\left(\frac{k}{n}\right) \end{aligned}$$

and for  $q = 2$

$$\begin{aligned} \text{bias}[\hat{Y}_i^{(1)} | \mathbb{U}] &= \frac{r^{(2)}(U_{(i)}) \sum_{j=1}^k (U_{(i+j)} - U_{(i-j)}) \{ (U_{(i+j)} - U_{(i)})^2 - (U_{(i-j)} - U_{(i)})^2 \}}{2 \sum_{p=1}^k (U_{(i+p)} - U_{(i-p)})^2} \\ &\quad + \frac{O_p(k^5/n^4)}{2 \sum_{p=1}^k (U_{(i+p)} - U_{(i-p)})^2} \\ &= \frac{O_p(k^{7/2}/n^3) + O_p(k^5/n^4)}{O_p(k^3/n^2)} \\ &= O_p\left\{ \max\left(\frac{k^{1/2}}{n}, \frac{k^2}{n^2}\right) \right\}. \end{aligned}$$

The bias can be split into two terms,  $\text{bias}_{\text{even}} = O_p(k^{1/2}/n)$  and  $\text{bias}_{\text{odd}} = O_p(k^2/n^2)$ .  $\text{bias}_{\text{even}}$  indicates the bias contribution from the even order term in the Taylor expansion of  $r(U_{(i \pm j)})$  and  $\text{bias}_{\text{odd}}$  for the odd order term. An analogous result can be obtained for  $q > 2$ .

## 7 Bias and Variance at the Left Boundary

Assume that  $r(\cdot)$  is three times continuously differentiable on  $[0, 1]$ . At the left boundary  $i < k + 1$ , we have

$$\begin{aligned}
\text{bias}[\hat{Y}_i^{(1)}|\mathbb{U}] &= \sum_{j=1}^{k(i)} w_{i,j} \cdot \left( \frac{\frac{1}{2} [(U_{(i+j)} - U_{(i)})^2 - \frac{1}{2}(U_{(i-j)} - U_{(i)})^2] r^{(2)}(U_{(i)})}{U_{(i+j)} - U_{(i-j)}} \right) \\
&+ \sum_{j=1}^{k(i)} w_{i,j} \cdot \left( \frac{O_p(j^3/n^3)}{U_{(i+j)} - U_{(i-j)}} \right) \\
&+ \sum_{j=k(i)+1}^k w_{i,j} \cdot \left( \frac{1}{2}(U_{(i+j)} - U_{(i)})r^{(2)}(U_{(i)}) \right) \left\{ 1 + o_p(1) \right\} \\
&= O_p \left\{ \max \left( \frac{k(i)^{7/2}}{k^3 n}, \frac{k(i)^5}{k^3 n^2}, \frac{k - k(i)}{n} \right) \right\} \\
\\
\mathbf{Var}[\hat{Y}_i^{(1)}|\mathbb{U}] &= \mathbf{Var} \left[ \sum_{j=1}^{k(i)} w_{i,j} \left( \frac{Y_{i+j} - Y_{i-j}}{U_{(i+j)} - U_{(i-j)}} \right) | \mathbb{U} \right] + \mathbf{Var} \left[ \sum_{j=k(i)+1}^k w_{i,j} \left( \frac{Y_{i+j} - Y_i}{U_{(i+j)} - U_{(i)}} \right) | \mathbb{U} \right] \\
&= 2\sigma_e^2 \sum_{j=1}^{k(i)} \left( \frac{w_{i,j}}{U_{(i+j)} - U_{(i-j)}} \right)^2 + \sigma_e^2 \sum_{j=k(i)+1}^k \left( \frac{w_{i,j}}{U_{(i+j)} - U_{(i)}} \right)^2 \\
&+ \sigma_e^2 \sum_{j=k(i)+1}^k \sum_{l=k(i)+1}^k \left( \frac{w_{i,j}}{U_{(i+j)} - U_{(i)}} \right) \left( \frac{w_{i,l}}{U_{(i+l)} - U_{(i)}} \right) \\
&= O_p \left\{ \max \left( \frac{n^2}{k^3}, \frac{n^2(k - k(i))^2}{k^4} \right) \right\}.
\end{aligned}$$

## References

- [1] H.A. David and H.N. Nagaraja. *Order Statistics, Third Edn.* John Wiley & Sons, 2003.
